# Supplementary material
Source: HighWire-hosted journal article supplement (https://jnm.snmjournals.org/highwire/filestream/94783/field_highwire_adjunct_files/0/154815_Supplemental_Data.pdf)
Supplement: 154815_Supplemental_Data.pdf [file 154815_Supplemental_Data.pdf]

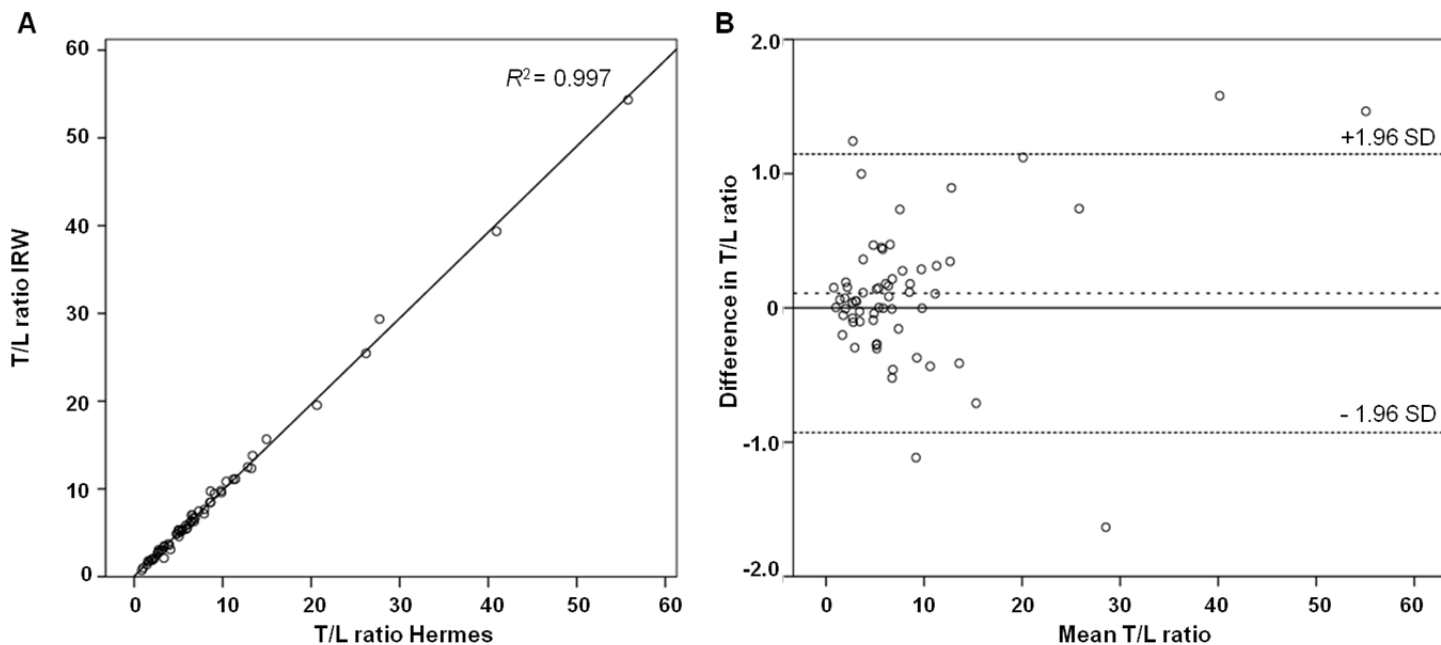

**SUPPLEMENTAL FIGURE 1.** Bland-Altman plots for tumor-to-liver ratios on single photon emission tomography (SPECT) as calculated by the two software systems (respectively Hermes and IRW). Bland-Altman analysis indicates the difference of the estimates obtained by the two methods in relation to the average of these estimates. The dotted lines represent the Bland-Altman limits ( $\pm 1.96 \times \text{SD}$ ) and the solid line represents the mean difference and the dashed line is the line of equality.

**SUPPLEMENTAL TABLE 1.** Patient Characteristics

| No. | Genotype | Age (yrs) | Sex (M/F) | Tumor location (A/EA) | Episode    | Max. tumor diameter (cm) | Total plasma MN <sup>1</sup> | Type scanner <sup>2</sup> | T/L ratio planar Hermes | T/L ratio SPECT Hermes | T/L ratio SPECT IRW | Daily dose potential interfering drug |
|-----|----------|-----------|-----------|-----------------------|------------|--------------------------|------------------------------|---------------------------|-------------------------|------------------------|---------------------|---------------------------------------|
| 1   | Sporadic | 49        | F         | RA                    | Primary    | 4,0                      | 9972                         | Ecam Dual                 | 1,53                    | 4,78                   | 4,87                |                                       |
| 2   | Sporadic | 54        | F         | LA                    | Primary    | 6,0                      | 36980                        | Ecam Dual                 | 2,05                    | 3,14                   | 3,09                |                                       |
| 3   | Sporadic | 49        | F         | LA                    | Primary    | 3,0                      | 8050                         | Ecam Dual                 | 1,28                    | 10,40                  | 10,83               | Labetolol 600 mg                      |
| 4   | Sporadic | 34        | F         | LA                    | Primary    | 3,5                      | 3543                         | Ecam Dual                 | 0,77                    | 2,66                   | 2,74                | Nifedipine 60 mg                      |
| 5   | Sporadic | 59        | M         | LA                    | Primary    | 11,0                     | 136000                       | Ecam Dual                 | 4,22                    | 26,19                  | 25,45               |                                       |
| 6   | Sporadic | 66        | M         | RA                    | Primary    | 4,5                      | 10255                        | Ecam Dual                 | 1,47                    | 6,44                   | 6,28                |                                       |
| 7   | Sporadic | 54        | F         | LA                    | Primary    | 11,0                     | 21665                        | Symbia T16                | 1,43                    | 3,97                   | 3,61                |                                       |
| 8   | Sporadic | 63        | F         | RA                    | Primary    | 3,5                      | 5667                         | Symbia T16                | 1,44                    | 3,41                   | 3,43                | Lercanidipine 10 mg                   |
| 9   | Sporadic | 55        | M         | RA                    | Primary    | 2,0                      | 1287                         | Ecam Dual                 | 1,31                    | 6,77                   | 6,30                |                                       |
| 10  | Sporadic | 39        | F         | RA                    | Primary    | 8,0                      | 43687                        | Ecam Dual                 | 1,34                    | 1,72                   | 1,77                |                                       |
| 11  | Sporadic | 64        | F         | RA                    | Primary    | 14,0                     | 229400                       | Ecam Dual                 | 5,58                    | 20,66                  | 19,35               |                                       |
| 12  | Sporadic | 52        | M         | EA                    | Primary    | 4,8                      | 10633                        | Ecam Dual                 | 0,85                    | 9,79                   | 9,79                | Amlodipine 20 mg                      |
| 13  | Sporadic | 29        | M         | EA                    | Primary    | 9,0                      | 1207                         | Symbia T16                | 2,92                    | 27,72                  | 29,35               |                                       |
| 14  | Sporadic | 55        | F         | LA                    | Primary    | 6,5                      | 9945                         | Ecam Dual                 | NA                      | 5,02                   | 5,32                |                                       |
| 15  | Sporadic | 51        | M         | EA                    | Metastasis | 2,0                      | 1173                         | Symbia T16                | 1,76                    | 7,94                   | 7,66                |                                       |
| 15  | Sporadic | 49        | M         | RA                    | Primary    | 6,2                      | 13479                        | Ecam Dual                 | 1,79                    | 7,31                   | 7,47                |                                       |
| 16  | Sporadic | 31        | F         | RA                    | Primary    | 5,0                      | 17210                        | Ecam Dual                 | 1,16                    | 13,38                  | 13,79               |                                       |
| 17  | Sporadic | 70        | F         | RA                    | Primary    | 2,5                      | 2007                         | Symbia T16                | 0,95                    | 3,02                   | 2,97                |                                       |
| 18  | Sporadic | 69        | F         | EA                    | Metastasis | 0,6                      | 1489                         | Infinia                   | 1,33                    | 9,87                   | 9,58                |                                       |
| 19  | Sporadic | 34        | F         | RA                    | Primary    | 2,9                      | 5171                         | Ecam Dual                 | 0,15                    | 0,86                   | 0,71                |                                       |
| 20  | Sporadic | 50        | F         | LA                    | Primary    | 4,9                      | 16762                        | Symbia T16                | 1,18                    | 3,83                   | 3,72                | Nifedipine 30 mg                      |
| 21  | Sporadic | 39        | F         | RA                    | Primary    | 8,5                      | 62121                        | Symbia T16                | 6,78                    | 55,80                  | 54,33               |                                       |
| 22  | Sporadic | 41        | F         | RA                    | Primary    | 4,5                      | 4211                         | Ecam Dual                 | 3,49                    | 11,43                  | 11,12               | Labetolol 200 mg                      |
| 23  | Sporadic | 26        | M         | RA                    | Primary    | 4,3                      | 1720                         | Ecam Dual                 | NA                      | 1,46                   | 1,39                |                                       |
| 24  | Sporadic | 53        | M         | LA                    | Primary    | 5,5                      | 25294                        | Symbia T16                | 0,49                    | 1,00                   | 1,00                |                                       |
| 25  | Sporadic | 17        | F         | RA                    | Primary    | 3,5                      | 7711                         | Symbia T16                | 3,04                    | 1,57                   | 1,77                |                                       |
| 26  | Sporadic | 32        | F         | LA                    | Primary    | 4,0                      | 3604                         | Symbia T16                | NA                      | 6,71                   | 6,72                | Amytriptiline 35 mg                   |
| 27  | Sporadic | 30        | M         | RA                    | Primary    | 6,5                      | 46660                        | Ecam Dual                 | 3,43                    | 13,24                  | 12,35               |                                       |
| 28  | Sporadic | 34        | F         | RA                    | Primary    | 4,5                      | 14287                        | Symbia T16                | 1,53                    | 6,58                   | 7,04                |                                       |
| 29  | Sporadic | 25        | F         | LA                    | Primary    | 2,3                      | 3383                         | Ecam Dual                 | 0,44                    | 2,11                   | 1,92                |                                       |
| 30  | Sporadic | 63        | M         | LA                    | Primary    | 1,8                      | 1061                         | Symbia T16                | NA                      | 1,98                   | 1,98                | Diltiazem 120 mg                      |
| 31  | Sporadic | 35        | F         | LA                    | Primary    | 6,2                      | 22599                        | Symbia T16                | 4,78                    | 14,95                  | 15,66               |                                       |
| 32  | Sporadic | 16        | F         | RA                    | Primary    | 4,8                      | 9896                         | Symbia T16                | 1,04                    | 1,95                   | 1,88                |                                       |

|    |                    |    |   |    |            |     |       |            |      |       |       |                     |
|----|--------------------|----|---|----|------------|-----|-------|------------|------|-------|-------|---------------------|
| 33 | Sporadic           | 43 | F | LA | Primary    | 5,6 | 13750 | Ecam Dual  | 1,24 | 4,10  | 3,10  |                     |
| 34 | MEN-2              | 36 | M | LA | Primary    | 5,0 | 1372  | Ecam Dual  | 0,61 | 6,00  | 5,56  |                     |
| 35 | MEN-2              | 29 | F | LA | Primary    | 2,5 | 8082  | Symbia T16 | 1,37 | 8,66  | 8,48  |                     |
| 36 | MEN-2              | 36 | M | LA | Primary    | ,9  | 1480  | Ecam Dual  | 0,90 | 5,22  | 5,08  |                     |
| 37 | MEN-2              | 56 | M | LA | Primary    | 1,4 | 833   | Ecam Dual  | 0,53 | 2,78  | 3,08  |                     |
| 38 | MEN-2              | 44 | M | RA | Primary    | 2,5 | 2339  | Ecam Dual  | 1,23 | 5,87  | 5,42  |                     |
| 39 | MEN-2              | 35 | F | LA | Primary    | 2,5 | 4142  | Ecam Dual  | 1,04 | 5,06  | 4,59  |                     |
| 40 | MEN-2              | 58 | F | LA | Primary    | 1,0 | 1928  | Ecam Dual  | 1,08 | 2,25  | 2,10  | Amlodipine 5 mg     |
| 41 | MEN-2              | 50 | M | LA | Primary    | 3,2 | 1837  | Symbia T16 | 0,99 | 11,19 | 11,09 |                     |
| 42 | MEN-2              | 55 | M | LA | Primary    | 2,3 | NA    | Ecam Dual  | 0,66 | 2,72  | 2,68  |                     |
| 43 | MEN-2              | 71 | M | RA | Primary    | 3,5 | 2379  | Ecam Dual  | 1,14 | 3,40  | 3,50  |                     |
| 44 | MEN-2 <sup>3</sup> | 61 | M | LA | Primary    | 5,0 | 13804 | Ecam Dual  | 2,31 | 7,90  | 7,17  |                     |
| 44 | MEN-2 <sup>3</sup> | 61 | M | RA | Primary    | 8,0 | 13804 | Ecam Dual  | 1,06 | 8,62  | 9,73  |                     |
| 45 | MEN-2 <sup>3</sup> | 47 | F | LA | Primary    | 8,0 | 25908 | Symbia T16 | 1,53 | 5,83  | 5,83  |                     |
| 45 | MEN-2 <sup>3</sup> | 47 | F | RA | Primary    | 6,5 | 25908 | Symbia T16 | 1,66 | 5,40  | 5,40  |                     |
| 46 | MAX                | 57 | M | LA | Primary    | 1,8 | 2904  | Ecam Dual  | 0,64 | 4,99  | 5,27  |                     |
| 47 | NF1                | 37 | F | EA | Primary    | 3,6 | 7752  | Ecam Dual  | 1,42 | 9,08  | 9,45  |                     |
| 48 | NF1                | 59 | F | LA | Primary    | 7,0 | 27931 | Ecam Dual  | 2,17 | 6,18  | 6,00  | Formoterol(dose NA) |
| 49 | SDHA               | 19 | F | RA | Primary    | 8,0 | 5164  | Ecam Dual  | 2,71 | 6,44  | 6,36  |                     |
| 50 | SDHB <sup>2</sup>  | 46 | M | EA | Metastasis | 6,4 | 728   | Symbia T16 | 0,56 | 6,48  | 7,00  |                     |
| 51 | SDHB               | 14 | F | EA | Primary    | 5,0 | 27676 | Symbia T16 | 3,81 | 12,83 | 12,48 |                     |
| 52 | SDHD <sup>4</sup>  | 32 | M | EA | Primary    | 3,0 | 2173  | Ecam Dual  | 1,04 | 8,56  | 8,45  |                     |
| 52 | SDHD <sup>4</sup>  | 32 | M | EA | Primary    | 2,5 | 2173  | Ecam Dual  | 0,55 | 5,43  | 5,28  |                     |
| 53 | SDHD               | 34 | F | EA | Primary    | 2,5 | 2782  | Symbia T16 | 0,86 | 4,87  | 4,91  |                     |
| 54 | SDHD               | 59 | F | EA | Primary    | 5,2 | 907   | Ecam Dual  | 4,45 | 40,94 | 39,36 |                     |
| 55 | SDHD               | 65 | M | LA | Primary    | 4,0 | 6448  | Symbia T16 | 1,24 | 5,05  | 5,32  | Amlodipine 5 mg     |
| 56 | VHL <sup>5</sup>   | 32 | M | EA | Primary    | 2,5 | 1245  | Ecam Dual  | 0,96 | 2,72  | 2,83  |                     |
| 56 | VHL <sup>5</sup>   | 32 | M | RA | Primary    | 1,5 | 1245  | Ecam Dual  | 0,34 | 3,36  | 2,12  |                     |
| 57 | VHL <sup>2</sup>   | 8  | F | EA | Metastasis | 2,7 | 27452 | Ecam Dual  | 2,23 | 6,86  | 6,64  |                     |

In total 57 patients.

<sup>1</sup>Upper reference limit of plasma metanephrines is 106-940 pmol/L.

<sup>2</sup>All Siemens except one patient (GE Healthcare Infinia).

*Abbreviations: M=male, F=female, yrs=years, A=adrenal, EA=extra-adrenal, MN=metanephrines,*

*NA=not assessed.*
